# Supplementary material for: Modulated synthesis and isoreticular expansion of Th-MOFs with record high pore volume and surface area for iodine adsorption
Source: Royal Society of Chemistry journal article supplement (doi:10.1039/d0cc02841j), 2020-01-01
Supplement: d0cc02841j1.pdf [file d0cc02841j1.pdf]

Supporting Information for  
Modulated Synthesis and Isostructural Expansion of Th-MOFs with  
Record High Pore Volume and Surface Area for Iodine Adsorption

*Zi-Jian Li,<sup>a</sup> Yu Ju,<sup>a,b</sup> Bowen Yu,<sup>a</sup> Xiaoling Wu,<sup>a</sup> Huangjie Lu,<sup>a</sup> Yongxin Li,<sup>c</sup> Jing Zhou,<sup>a</sup>  
Xiaofeng Guo,<sup>d</sup> Zhi-Hui Zhang,<sup>b</sup> Jian Lin,<sup>\*a</sup> Jian-Qiang Wang,<sup>a,e</sup> and Shuao Wang<sup>f</sup>*

Key Laboratory of Interfacial Physics and Technology, Shanghai Institute of Applied  
Physics, Chinese Academy of Sciences, 2019 Jia Luo Road, Shanghai 201800, China.

<sup>b</sup> Jiangsu Key Laboratory of Advanced Catalytic Materials and Technology,  
Changzhou University, Changzhou 213164, China

<sup>c</sup> Division of Chemistry and Biological Chemistry, School of Physical and  
Mathematical Sciences, Nanyang Technological University, 637371, Singapore

<sup>d</sup> Department of Chemistry and Alexandra Navrotsky Institute for Experimental  
Thermodynamics, Washington State University, Pullman, WA 99164-4630, USA

<sup>e</sup> Dalian National Laboratory for Clean Energy, Dalian 116023, China

<sup>f</sup> Radiological and Interdisciplinary Sciences (RAD-X) and Collaborative Innovation  
Centre of Radiological Medicine of Jiangsu Higher Education Institutions, Soochow  
University, Suzhou 215123, China.

## Table of Content

|                                                                                                                                                                                                                                                                                                       |           |
|-------------------------------------------------------------------------------------------------------------------------------------------------------------------------------------------------------------------------------------------------------------------------------------------------------|-----------|
| <b>S1. EXPERIMENTAL SECTION</b> .....                                                                                                                                                                                                                                                                 | <b>3</b>  |
| S1.1 Synthesis.....                                                                                                                                                                                                                                                                                   | 3         |
| S1.2 Characterizations .....                                                                                                                                                                                                                                                                          | 5         |
| S1.3 Adsorption Studies .....                                                                                                                                                                                                                                                                         | 6         |
| <b>S2. FIG.S AND TABLES</b> .....                                                                                                                                                                                                                                                                     | <b>8</b>  |
| Fig. S1 SEM images and (b) PXRD patterns of Th-SINAP-10 samples synthesized in the presence of 0, 10, 20, 30, 40, 50, and 60 equivalents of concentrated HNO <sub>3</sub> . ....                                                                                                                      | 8         |
| Fig. S2 BET Surface area plots of (a) Th-SINAP-9, (b) Th-SINAP-10, (c) Th-SINAP-11, (d) Th-SINAP-13, and (e) Th-SINAP-14. (f) Comparison of the BET surface areas and solvent accessible volumes of Th-SINAP-13 and Th-SINAP-14 with those of other reported thorium materials. <sup>7-14</sup> ..... | 9         |
| Fig. S3 PXRD patterns of (a) Th-SINAP-9, (b) Th-SINAP-10, (c) Th-SINAP-11, (d) Th-SINAP-12, (e) Th-SINAP-13, (f) Th-SINAP-14, and (g) Th-SINAP-15 treated under various conditions. ....                                                                                                              | 10        |
| Fig. S4 The TGA plots of Th-SINAP-n (n = 9-15). ....                                                                                                                                                                                                                                                  | 11        |
| Fig. S5 (a) Removal rate of iodine from cyclohexane solutions by Th-SINAP-n. (b) Iodine adsorption isotherms of Th-SINAP-10 and Th-SINAP-12. Solid line: Langmuir fitting; dash line: Freundlich fitting. ....                                                                                        | 11        |
| Fig. S6 XPS spectra of I <sub>2</sub> /cyclohexane and I <sub>2</sub> vapour adsorbed Th-SINAP-n. ....                                                                                                                                                                                                | 12        |
| Table S1. Synthetic details to obtain the large single crystals of Th-SINAP-n (n=9-15). ...                                                                                                                                                                                                           | 13        |
| Table S2. Performance of HCOOH, CF <sub>3</sub> COOH, concentrated HNO <sub>3</sub> , and concentrated HCl as modulators for Th-MOFs synthesis.....                                                                                                                                                   | 14        |
| Table S3. Crystallographic Data for Th-SINAP-n (n=9-15). ....                                                                                                                                                                                                                                         | 15        |
| Table S4. Iodine adsorption capacities of selected MOFs.....                                                                                                                                                                                                                                          | 16        |
| Table S5. Kinetic parameters of the pseudo-second-order model for iodine adsorption toward Th-SINAP-10 and Th-SINAP-12. ....                                                                                                                                                                          | 17        |
| Table S6. Fitting results of the sorption isotherms according to the Langmuir and Freundlich equations.....                                                                                                                                                                                           | 17        |
| <b>S3. REFERENCES</b> .....                                                                                                                                                                                                                                                                           | <b>18</b> |

## S1. EXPERIMENTAL SECTION

### S1.1 Synthesis

**Materials and Synthesis.**  $\text{Th}(\text{NO}_3)_4 \cdot 6\text{H}_2\text{O}$  (99%, Changchun Institute of Applied Chemistry, Chinese Academy of Sciences), formic acid ( $\text{HCOOH}$ , 98%+, Adamas), concentrated  $\text{HCl}$  (36.0~38.0%, Sinopharm Chemical Reagent Co.,Ltd), concentrated  $\text{HNO}_3$  (65.0~68.0%, Sinopharm Chemical Reagent Co.,Ltd),  $\text{CF}_3\text{COOH}$  (99%, Adamas), terephthalic acid (99%, Adamas), biphenyldicarboxylic acid (99%, Adamas), fumaric acid (99%, Adamas), 4-carboxycinnamic acid (99%, Adamas), 1,4-phenylenediacrylic acid (99%, Adamas), 4,4'-azobenzene-1,2-dicarboxylic acid (98%, Jilin Chinese Academy of Sciences - Yanshen Technology Co., Ltd), 4,4'-stilbenedicarboxylic acid (99%, Adamas), *N,N'*-Dimethylformamide (DMF, 99%, Adamas), dichloromethane (DCM, 99.5%, Greagent), tetrahydrofuran (THF, 99.5%, Adamas), acetonitrile ( $\text{CH}_3\text{CN}$ ,  $\geq 99.0\%$ , Greagent), acetone (99.5%, Sinopharm Chemical Reagent Co.,Ltd), n-hexane (97%, SafeDry, Adamas), diethyl ether (99%, Sinopharm Chemical Reagent Co.,Ltd), cyclohexane (99%+, Adamas), and iodine ( $\text{I}_2$ , 99%, Adamas) were used as received and without further purification.

*Caution!*  $^{232}\text{Th}$  used in this study is an  $\alpha$  emitter with the daughter of radioactive Ra-228. All thorium compounds used and investigated were operated in an authorized laboratory designed for actinide element studies. Standard precautions for handling radioactive materials should be followed.

**Th-SINAP-9.** A mixture of  $\text{Th}(\text{NO}_3)_4 \cdot 6\text{H}_2\text{O}$  (4.7 mg, 0.008 mmol), fumaric acid ( $\text{H}_2\text{FUM}$ , 0.46 mg, 0.004 mmol), DMF (0.37 mL),  $\text{HCOOH}$  (0.04 mL) in a capped vial was heated at 120 °C for 24 h. Colourless octahedral crystals were filtered, washed with MeOH and  $\text{Et}_2\text{O}$ , and dried at room temperature. The pH values before and after reaction are 2.07 and 5.09, respectively. Yield, 36% based on  $\text{H}_2\text{FUM}$ . Anal. Calcd for  $\text{Th}_6(\mu_3\text{-O})_4(\mu_3\text{-OH})_4(\text{FUM})_6(\text{H}_2\text{O})_6(\text{C}_3\text{H}_7\text{NO})_{11}(\text{H}_2\text{O})_{19}$ ,  $\text{C}_{57}\text{H}_{143}\text{N}_{11}\text{Th}_6\text{O}_{68}$ , C, 19.77; H, 4.16; N, 4.45. Found: C, 19.78; H, 4.39; N, 4.53%. IR: 1655 (s), 1574(s), 1386 (vs), 1201 (w), 1103 (w), 798 (w), 666 (m), 600 (m), 529 (s)  $\text{cm}^{-1}$ . Microcrystalline powder can be obtained as followed: A mixture of  $\text{Th}(\text{NO}_3)_4 \cdot 6\text{H}_2\text{O}$  (23.5 mg, 0.04 mmol), fumaric acid (2.3 mg, 0.02 mmol), DMF (0.69 mL),  $\text{HCOOH}$  (0.02 mL),  $\text{H}_2\text{O}$  (0.15 mL) in a capped vial was heated at 120 °C for 24 h. Colourless microcrystals were filtered, washed with MeOH and  $\text{Et}_2\text{O}$ , and dried at room temperature.

**Th-SINAP-10.** A mixture of  $\text{Th}(\text{NO}_3)_4 \cdot 6\text{H}_2\text{O}$  (4.7 mg, 0.008 mmol), terephthalic acid ( $\text{H}_2\text{BDC}$ , 0.66 mg, 0.004 mmol), DMF (0.38 mL),  $\text{HCOOH}$  (0.045 mL) or concentrated  $\text{HNO}_3$  (0.035 mL) or  $\text{CF}_3\text{COOH}$  (0.03 mL) in a capped vial was heated at 120 °C for 24 h. Colourless octahedral crystals were filtered, washed with MeOH and  $\text{Et}_2\text{O}$ , and dried at room temperature. The pH values before and after reaction for  $\text{HCOOH}$ ,  $\text{CF}_3\text{COOH}$ , and conc.  $\text{HNO}_3$  are 2.12/5.04, 1.34/5.52, and 0.63/5.09, respectively. Yield, 36% based on  $\text{H}_2\text{BDC}$ . Anal. Calcd for  $\text{Th}_6(\mu_3\text{-O})_4(\mu_3\text{-OH})_4(\text{BDC})_{12}(\text{H}_2\text{O})_6(\text{C}_3\text{H}_7\text{NO})_{11}(\text{H}_2\text{O})_9$ ,  $\text{C}_{81}\text{H}_{135}\text{N}_{11}\text{Th}_6\text{O}_{58}$ , C, 27.15; H, 3.80; N, 4.30. Found: C, 27.46; H, 3.69; N, 4.23%. IR: 1651 (s), 1583 (vs), 1502 (m), 1382 (vs), 1201 (w), 1096 (w), 747 (m), 506 (m)  $\text{cm}^{-1}$ . Microcrystalline powder can be obtained

as followed: A mixture of  $\text{Th}(\text{NO}_3)_4 \cdot 6\text{H}_2\text{O}$  (23.5 mg, 0.04 mmol), terephthalic acid (3.3 mg, 0.02 mmol), DMF (0.69 mL),  $\text{CF}_3\text{COOH}$  (0.06 mL),  $\text{H}_2\text{O}$  (0.06 mL) in a capped vial was heated at 120 °C for 48 h. Colourless microcrystals were filtered, washed with MeOH and  $\text{Et}_2\text{O}$ , and dried at room temperature.

**Th-SINAP-11.** A mixture of  $\text{Th}(\text{NO}_3)_4 \cdot 6\text{H}_2\text{O}$  (4.7 mg, 0.008 mmol), 4-carboxycinnamic acid, *predominantly trans* ( $\text{H}_2\text{CCN}$ , 0.77 mg, 0.004 mmol), DMF (0.42 mL),  $\text{CF}_3\text{COOH}$  (0.015 mL) or concentrated  $\text{HNO}_3$  (0.035 mL) or concentrated HCl (0.07 mL), in a capped vial was heated at 120 °C for 24 h. The pH values before and after reaction for  $\text{CF}_3\text{COOH}$ , conc.  $\text{HNO}_3$ , and conc. HCl are 1.74/7.16, 1.01/5.29, and 0.56/4.58, respectively. Colourless octahedral crystals were filtered, washed with MeOH and  $\text{Et}_2\text{O}$ , and dried at room temperature. Yield, 36% based on  $\text{H}_2\text{CCN}$ . Anal. Calcd for  $\text{Th}_6(\mu_3\text{-O})_4(\mu_3\text{-OH})_4(\text{CCN})_{12}(\text{H}_2\text{O})_6(\text{DMF})_{18}(\text{H}_2\text{O})_{16}$ ,  $\text{C}_{114}\text{H}_{210}\text{N}_{18}\text{Th}_6\text{O}_{72}$ , C, 31.28; H, 4.84; N, 5.76. Found: C, 31.21; H, 4.72; N, 5.42%. IR: 1651 (s), 1593 (w), 1430 (w), 1382 (s), 1098 (w), 789 (s), 576 (m), 456 (w)  $\text{cm}^{-1}$ . Microcrystals can be obtained as followed: A mixture of  $\text{Th}(\text{NO}_3)_4 \cdot 6\text{H}_2\text{O}$  (23.5 mg, 0.04 mmol), 4-carboxycinnamic acid, *predominantly trans* (3.8 mg, 0.02 mmol), DMF (0.9 mL),  $\text{CF}_3\text{COOH}$  (0.045 mL) in a capped vial was heated at 120 °C for 24 h. Colourless octahedral crystals were filtered, washed with MeOH and  $\text{Et}_2\text{O}$ , and dried at room temperature.

**Th-SINAP-12.** A mixture of  $\text{Th}(\text{NO}_3)_4 \cdot 6\text{H}_2\text{O}$  (4.7 mg, 0.008 mmol), 1,4-phenylenediacrylic acid ( $\text{H}_2\text{PEDA}$ , 0.87 mg, 0.004 mmol), DMF (0.42 mL),  $\text{HCOOH}$  (0.05 mL)/ $\text{H}_2\text{O}$  (0.03 mL) or  $\text{CF}_3\text{COOH}$  (0.05 mL)/ $\text{H}_2\text{O}$  (0.03 mL) in a capped vial was heated at 120 °C for 24 h. The pH values before and after reaction for  $\text{HCOOH}$  and  $\text{CF}_3\text{COOH}$  are 2.10/5.68 and 1.35/6.75, respectively. Colourless octahedral crystals were filtered, washed with MeOH and  $\text{Et}_2\text{O}$ , and dried at room temperature. Yield, 36% based on  $\text{H}_2\text{PEDA}$ . Anal. Calcd for  $\text{Th}_6(\mu_3\text{-O})_4(\mu_3\text{-OH})_4(\text{PEDA})_6(\text{H}_2\text{O})_6(\text{DMF})_{16}(\text{H}_2\text{O})_{25}$ ,  $\text{C}_{120}\text{H}_{226}\text{N}_{16}\text{Th}_6\text{O}_{79}$ , C, 31.68; H, 5.01; N, 4.93. Found: C, 31.36; H, 4.87; N, 5.22%. IR: 1651 (s), 1428 (w), 1382 (s), 981 (w), 835 (s), 696 (m), 556 (s)  $\text{cm}^{-1}$ . Microcrystals can be obtained as followed: A mixture of  $\text{Th}(\text{NO}_3)_4 \cdot 6\text{H}_2\text{O}$  (23.5 mg, 0.04 mmol), 1,4-phenylenediacrylic acid (4.4 mg, 0.02 mmol), DMF (1.8 mL), concentrated  $\text{HNO}_3$  (0.05 mL),  $\text{H}_2\text{O}$  (0.03 mL) in a capped vial was heated at 120 °C for 48 h. Colourless crystals were filtered, washed with MeOH and  $\text{Et}_2\text{O}$ , and dried at room temperature.

**Th-SINAP-13.** A mixture of  $\text{Th}(\text{NO}_3)_4 \cdot 6\text{H}_2\text{O}$  (4.7 mg, 0.008 mmol), biphenyldicarboxylic acid ( $\text{H}_2\text{BPDC}$ , 0.97 mg, 0.004 mmol), DMF (0.38 mL),  $\text{HCOOH}$  (0.015 mL) or  $\text{CF}_3\text{COOH}$  (0.015 mL) or concentrated  $\text{HNO}_3$  (0.03 mL) or concentrated HCl (0.06 mL) in a capped vial was heated at 120 °C for 24 h. The pH values before and after reaction for  $\text{HCOOH}$ ,  $\text{CF}_3\text{COOH}$ , conc.  $\text{HNO}_3$ , and conc. HCl are 2.50/6.07, 1.64/7.42, 0.96/5.38, and 0.52/4.60, respectively. Colourless octahedral crystals were filtered, washed with MeOH and  $\text{Et}_2\text{O}$ , and dried at room temperature. Yield, 36% based on  $\text{H}_2\text{BPDC}$ . Anal. Calcd for  $\text{Th}_6(\mu_3\text{-O})_4(\mu_3\text{-OH})_4(\text{BPDC})_6(\text{H}_2\text{O})_6(\text{DMF})_{12}(\text{H}_2\text{O})_2$ ,  $\text{C}_{120}\text{H}_{152}\text{N}_{12}\text{Th}_6\text{O}_{52}$ , C, 36.15; H, 3.85; N, 4.22. Found: C, 36.08; H, 4.06; N, 4.52%. IR: 1653 (s), 1595 (s), 1384 (vs), 1312 (w), 1091 (m), 770 (m), 576 (m), 515 (w)  $\text{cm}^{-1}$ . Microcrystalline powder can be obtained as

followed: A mixture of  $\text{Th}(\text{NO}_3)_4 \cdot 6\text{H}_2\text{O}$  (23.5 mg, 0.04 mmol), biphenyldicarboxylic acid (4.8 mg, 0.02 mmol), DMF (0.79 mL), concentrated HCl (0.05 mL) in a capped vial was heated at 120 °C for 24 h. Colourless microcrystals were filtered, washed with MeOH and  $\text{Et}_2\text{O}$ , and dried at room temperature.

**Th-SINAP-14.** A mixture of  $\text{Th}(\text{NO}_3)_4 \cdot 6\text{H}_2\text{O}$  (4.7 mg, 0.008 mmol), 4,4'-azobenzene dicarboxylic acid ( $\text{H}_2\text{ABDC}$ , 1.1 mg, 0.004 mol), DMF (0.38 mL),  $\text{HCOOH}$  (0.03 mL) or concentrated  $\text{HNO}_3$  (0.03 mL) or concentrated HCl (0.045 mL) in a capped vial was heated at 120 °C for 24 h. The pH values before and after reaction for  $\text{HCOOH}$ , conc.  $\text{HNO}_3$ , and conc. HCl are 2.25/5.16, 0.93/5.19, and 0.63/4.92, respectively. Red octahedral crystals were filtered, washed with MeOH and  $\text{Et}_2\text{O}$ , and dried at room temperature. Yield, 54% based on  $\text{H}_2\text{ABDC}$ . Anal. Calcd for  $\text{Th}_6(\mu_3\text{-O})_4(\mu_3\text{-OH})_4(\text{ABDC})_6(\text{H}_2\text{O})_6(\text{DMF})_3(\text{H}_2\text{O})_{27}$ ,  $\text{C}_{93}\text{H}_{139}\text{N}_{15}\text{Th}_6\text{O}_{68}$ , C, 28.30; H, 3.55; N, 5.32. Found: C, 28.12; H, 3.08; N, 5.32%. IR: 1594 (s), 1556 (s), 1387 (vs), 1096 (w), 1011 (m), 875 (w), 792 (s), 706 (w), 578 (w), 533 (w)  $\text{cm}^{-1}$ .

**Th-SINAP-15.** A mixture of  $\text{Th}(\text{NO}_3)_4 \cdot 6\text{H}_2\text{O}$  (4.7 mg, 0.008 mmol), 4,4'-stilbenedicarboxylic acid ( $\text{H}_2\text{SBDC}$ , 1.1 mg, 0.004 mmol), DMF (0.42 mL),  $\text{HCOOH}$  (0.03 mL) or  $\text{CF}_3\text{COOH}$  (0.045 mL) or concentrated  $\text{HNO}_3$  (0.03 mL) or concentrated HCl (0.06 mL) in a capped vial was heated at 120 °C for 24 h. The pH values before and after reaction for  $\text{HCOOH}$ ,  $\text{CF}_3\text{COOH}$ , conc.  $\text{HNO}_3$ , and conc. HCl are 2.13/5.37, 1.37/6.84, 0.97/5.39, and 0.73/4.59, respectively. Colourless octahedral crystals were filtered, washed with MeOH and  $\text{Et}_2\text{O}$ , and dried at room temperature. Yield, 36% based on  $\text{H}_2\text{SBDC}$ . Anal. Calcd for  $\text{Th}_6(\mu_3\text{-O})_4(\mu_3\text{-OH})_4(\text{SBDC})_6(\text{H}_2\text{O})_6(\text{DMF})_5(\text{H}_2\text{O})_{20}$ ,  $\text{C}_{111}\text{H}_{151}\text{N}_5\text{Th}_6\text{O}_{63}$ , C, 33.70; H, 3.85; N, 1.77. Found: C, 33.92; H, 3.39; N, 1.83%. IR: 1652 (s), 1497 (w), 1382 (w), 788 (m), 707 (w), 574 (m), 513 (w)  $\text{cm}^{-1}$ . Microcrystalline powder can be obtained as followed: A mixture of  $\text{Th}(\text{NO}_3)_4 \cdot 6\text{H}_2\text{O}$  (23.5 mg, 0.04 mmol), 4,4'-stilbenedicarboxylic acid (5.4 mg, 0.02 mmol), DMF (1.8 mL), concentrated  $\text{HNO}_3$  (0.05 mL) and  $\text{H}_2\text{O}$  (0.05 mL) in a capped vial was heated at 120 °C for 48 h. Colourless microcrystalline powder were filtered, washed with MeOH and  $\text{Et}_2\text{O}$ , and dried at room temperature.

## S1.2 Characterizations

*X-ray Crystallography.* Single-crystal XRD data was collected on a Bruker D8-Venture single-crystal X-ray diffractometer equipped with a Turbo X-ray source (Mo  $\text{K}\alpha$  radiation,  $\lambda = 0.71073 \text{ \AA}$ ) adopting the direct-drive rotating-anode technique and a CMOS detector. The data frames were collected using the APEX3 program and processed using the *SAINT* routine. The empirical absorption correction was applied using the SADABS program.<sup>1</sup> The structure was solved by Intrinsic Phasing with *ShelXT*<sup>2</sup> and refined with *ShelXL*<sup>3</sup> using *OLEX2*<sup>4</sup>. All the non-H atoms were subjected to anisotropic refinement by full-matrix program. Contributions to scattering due to these highly disordered solvent molecules were removed using the *SQUEEZE* routine of *PLATON*<sup>5</sup>; Structures were then refined again using the data generated. Crystal data and details of the data collection are given in Table S3.

Powder X-ray diffraction (PXRD) data were collected on were collected from 2 to 40 ° with a step of 0.02 ° on a Bruker D8 Advance diffractometer with Cu  $\text{K}\alpha$

radiation ( $\lambda = 1.54178 \text{ \AA}$ ). The calculated PXRD pattern was produced from the CIFs using the SHELXTL-XPOW program.

*N<sub>2</sub> adsorption and Brunauer-Emmett-Teller (BET) Analysis.* The N<sub>2</sub> adsorption isotherms were recorded at 77 K by using a micromeritics ASAP 2020 surface area and porosity analyser. Before the adsorption measurements, the freshly prepared samples of **Th-SINAP-10/12/13**, **Th-SINAP-9**, and **Th-SINAP-11** were repeatedly exchanged with MeOH, THF, and DCM for 24 h, respectively. Then the crystals were activated with the “degas” port under the vacuum at 120 °C for 6 h. **Th-SINAP-14** was soaked in 20 mL of DCM three times over 1 h (20 min each) and subsequently immersed in 20 mL n-hexane three times over 1h (20 min each).<sup>6</sup> Then the crystals were activated with the “degas” port under the vacuum under room temperature.

*Thermogravimetric Analysis (TGA).* TGA was carried out in an N<sub>2</sub> atmosphere with a heating rate of 10 °C/min from 40 °C to 900 °C on a NETZSCH STA 449 F3 Jupiter instrument. TGA indicated that the solvent species were removed gradually from room temperature in all cases (Fig. S3). **Th-SINAP-13** exhibits the highest thermal stability (ca.540 °C). The initial weight loss from RT to 540 °C was 25.3%, corresponding to the loss of DMF, lattice, and coordinating water molecules (*calcd* 25.6%). **Th-SINAP-9**, **Th-SINAP-10**, **Th-SINAP-11**, **Th-SINAP-12**, **Th-SINAP-14**, and **Th-SINAP-15** are thermally stable up to *ca.*380, 470, 470, 420, 460, and 430 °C, respectively. The initial weight loss from RT to those temperatures were 34.5%, 29.3%, 38.4%, 33.3%, 24.9%, and 26.5%, respectively, which can be attributed to the removal of the guest species (*calcd* 36.2%, 30.0%, 39.1%, 38.0%, 20.6%, and 21.1%).

*X-ray photoelectron spectroscopy (XPS).* The XPS data of iodine adsorbed samples were recorded on a Thermo Scientific ESCALAB 250Xi using monochromatic Al K $\alpha$  (1486.8 eV) X-ray source with a spot size of 500  $\mu\text{m}$ . The anode was operated at 15 kV and 10 mA.

### S1.3 Adsorption Studies

Stable isotope (<sup>127</sup>I) was used as a surrogate for the radioactive ones (<sup>129</sup>I and <sup>131</sup>I) as their chemical properties are nearly identical.

*Iodine/Cyclohexane Adsorption Measurement.* Adsorption studies were performed by immersing 20 mg sample in 8 mL of a 200 mg·L<sup>-1</sup> iodine/cyclohexane solution. The supernatant solution was used for each UV–vis absorbance measurement (UV-2600, SHIMADZU) periodically. After each measurement, the solution was dispensed back into the respective vial to keep the volume constant. The absorbance at maximum wavelength of iodine ( $\lambda_{\text{max}} = 522 \text{ nm}$ ) was chosen to calculate the iodine content, and the absorbance value for the original solution was normalized to 100%. The removal ratios (*R*) of iodine were calculated using  $R = (C_0 - C_t)/C_0 \times 100\%$  (where  $C_0$  and  $C_t$  represent the initial concentration and concentration at time  $t$ , respectively). Sorption kinetics of iodine in **Th-SINAP-10** and **Th-SINAP-12** were fitted to a pseudo-second-order kinetics model, respectively,  $t/q_t = 1/h + t/q_e$  (where  $q_t$ ,  $q_e$  represent the amounts of adsorbate at certain time  $t$  or at equilibrium time,  $h$  is the

initial adsorption rate,  $h = kq_e^2$ , and  $k$  is the rate constant) (Table S4).

The sorption isotherms of iodine in **Th-SINAP-10** and **Th-SINAP-12** were determined by adding 20 mg solid samples into 8 mL solutions with various iodine concentrations and the Langmuir and Freundlich models were used to interpret the experimental data. The linear equation of the Langmuir isotherm model is expressed as followed:

$$\frac{C_e}{q_e} = \frac{1}{q_m k_L} + \frac{C_e}{q_m}$$

Where  $q_m$  is the maximum sorption capacity corresponding to complete monolayer coverage (mg/g) and  $k_L$  is a constant indirectly related to sorption capacity and energy of sorption (L/mg), which characterizes the affinity of the adsorbate with the adsorbent. The linearized plot was obtained when we plotted  $C_e/q_e$  against  $C_e$  and  $q_m$  and  $k_L$  could be calculated from the slope and intercept.

The linear equation of Freundlich isotherm model can be expressed by:

$$\ln q_e = \ln k_F + \frac{1}{n} \ln C_e$$

Where  $k_F$  and  $n$  are the Freundlich constants related to the sorption capacity and the sorption intensity, respectively. The linear plot was obtained by plotting  $\ln q_e$  against  $\ln C_e$ , and the values of  $k_F$  and  $n$  were calculated from the slope and intercept of the straight line. Table S5 shows the fitting results from the Langmuir and Freundlich models.

*Iodine Vapour Adsorption Measurement.* An open vial (20 mL) containing 50 mg samples was accurately weighted ( $m_0$ ) and introduced into a glass vessel (150 mL) containing 1 g iodine. The vessel was sealed and kept in an oven at 80 °C. After certain time intervals, the vial containing the sample was weighed periodically ( $m_t$ ) until the mass of it did not change. The iodine adsorption capacity can be calculated as:  $\text{wt}\% = (m_t - m_0)/m_0$ .

## S2. FIG.S AND TABLES

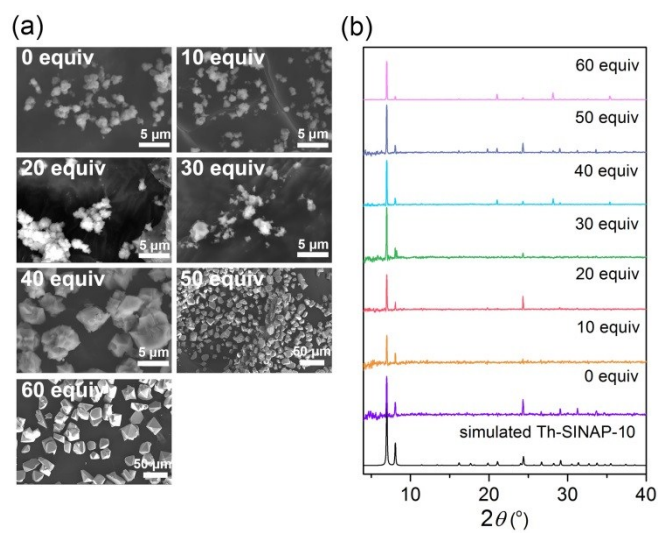

Fig. S1 SEM images and (b) PXRD patterns of **Th-SINAP-10** samples synthesized in the presence of 0, 10, 20, 30, 40, 50, and 60 equivalents of concentrated HNO<sub>3</sub>.



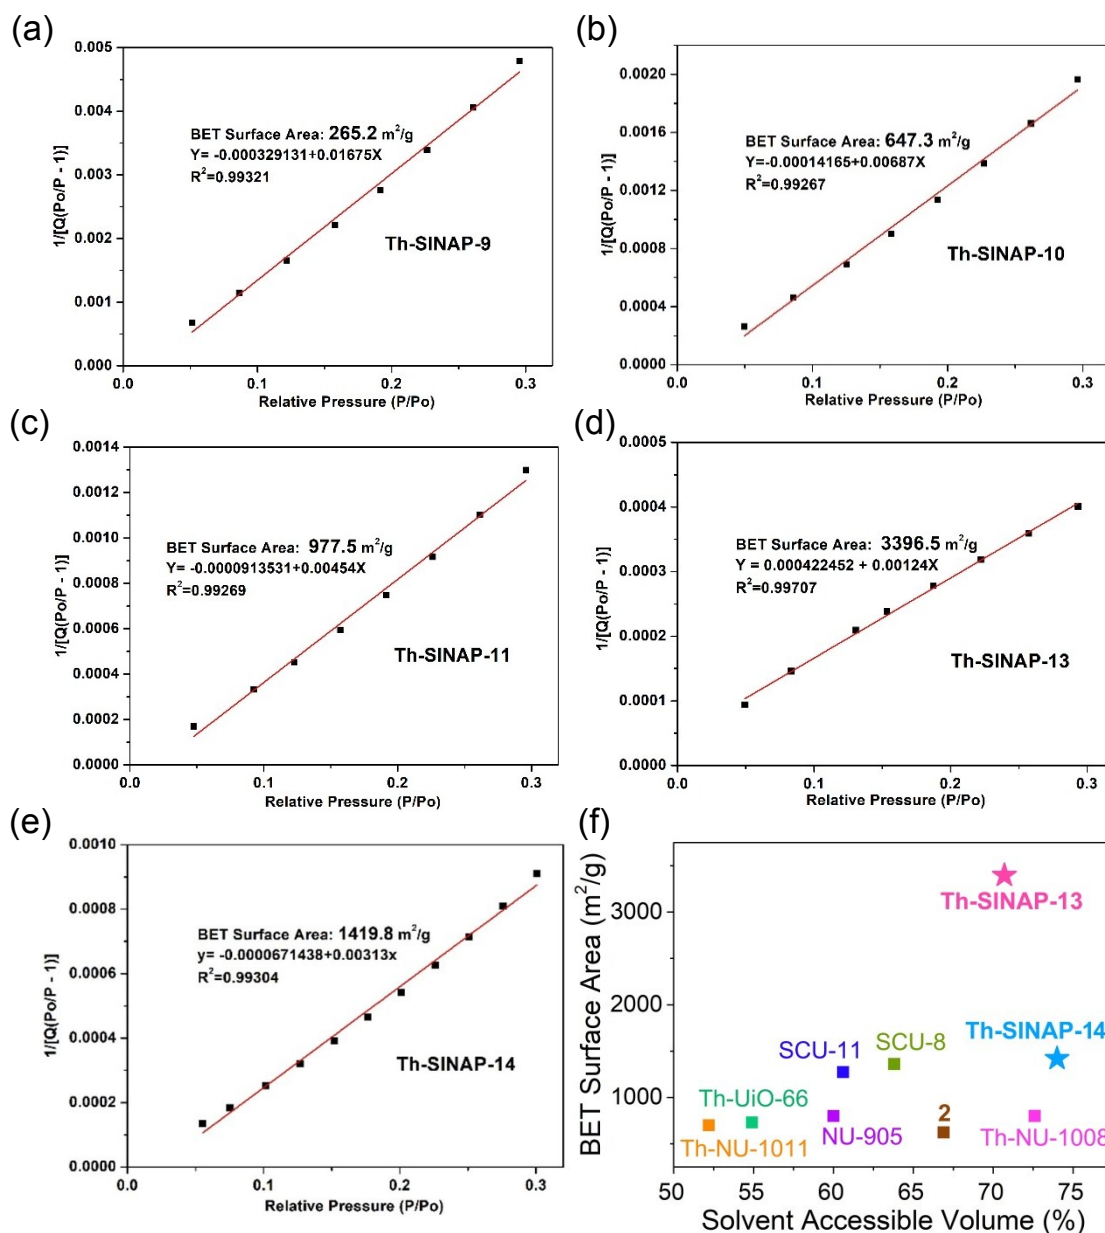

Fig. S2 BET Surface area plots of (a) **Th-SINAP-9**, (b) **Th-SINAP-10**, (c) **Th-SINAP-11**, (d) **Th-SINAP-13**, and (e) **Th-SINAP-14**. (f) Comparison of the BET surface areas and solvent accessible volumes of **Th-SINAP-13** and **Th-SINAP-14** with those of other reported thorium materials.<sup>7-14</sup>

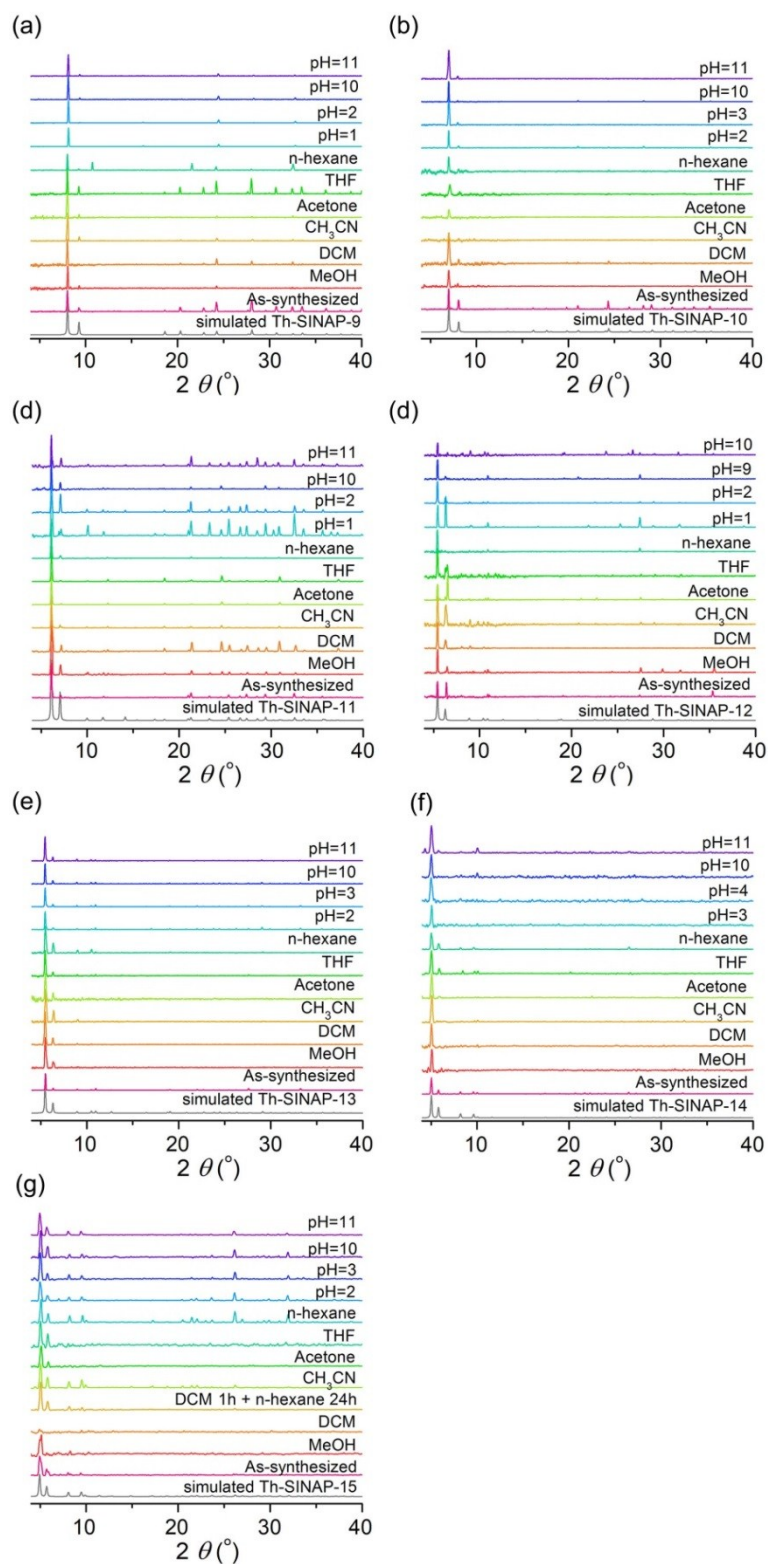

Fig. S3 PXRD patterns of (a) **Th-SINAP-9**, (b) **Th-SINAP-10**, (c) **Th-SINAP-11**, (d) **Th-SINAP-12**, (e) **Th-SINAP-13**, (f) **Th-SINAP-14**, and (g) **Th-SINAP-15** treated under various conditions. Exposing **Th-SINAP-15** to DCM for 1h resulted in the loss of its crystallinity, which however can be fully restored after soaking in hexane for 24 h.

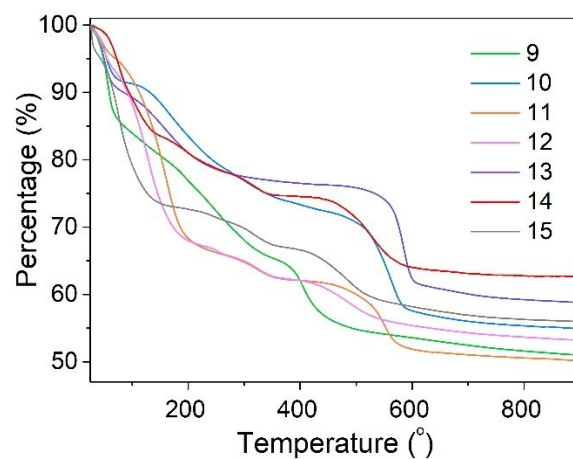

Fig. S4 The TGA plots of **Th-SINAP-n** (n = 9-15).

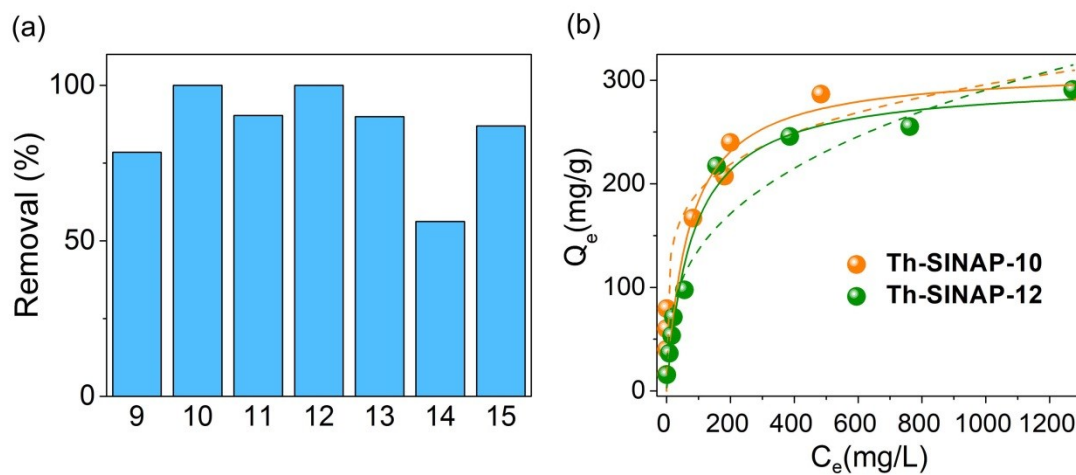

Fig. S5 (a) Removal rate of iodine from cyclohexane solutions by **Th-SINAP-n**. (b) Iodine adsorption isotherms of **Th-SINAP-10** and **Th-SINAP-12**. Solid line: Langmuir fitting; dash line: Freundlich fitting.

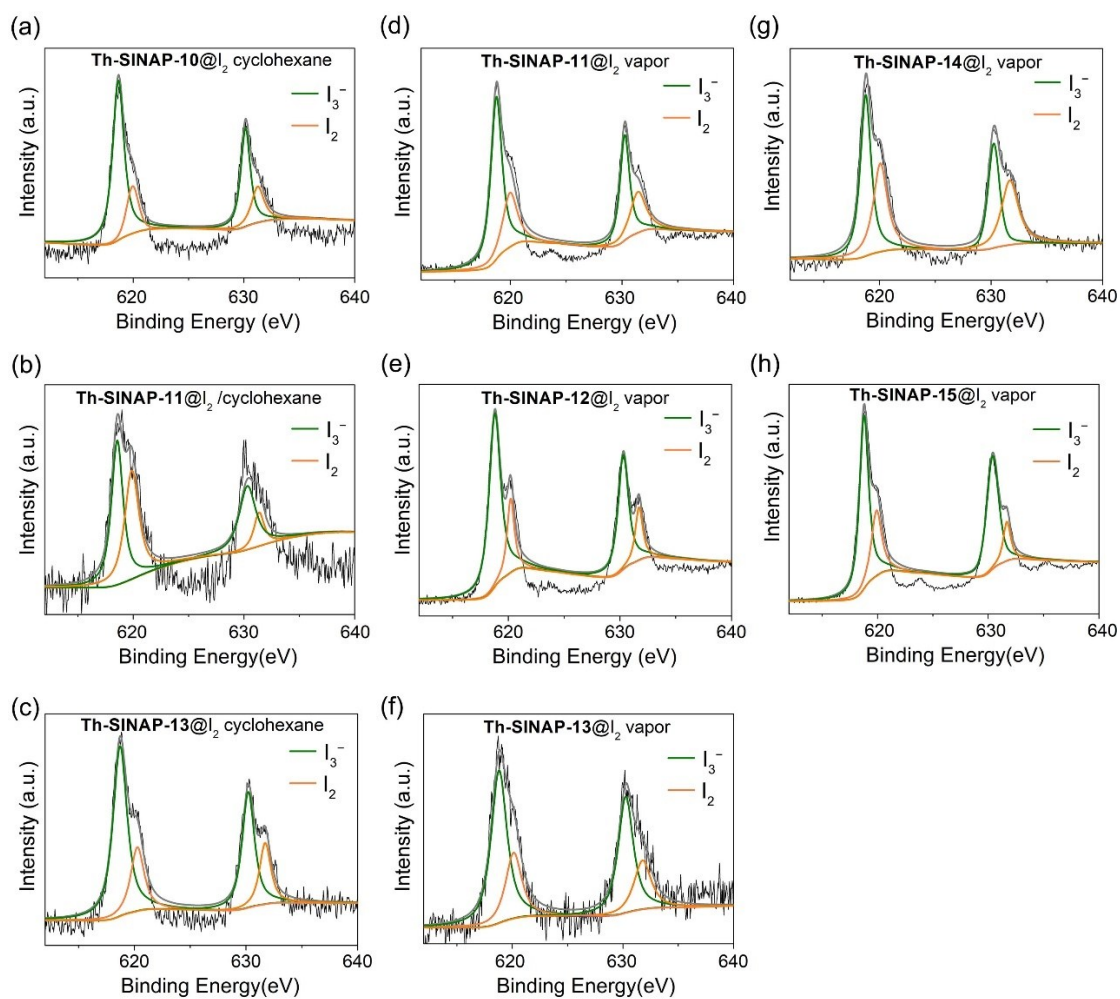

Fig. S6 XPS spectra of  $I_2$ /cyclohexane and  $I_2$  vapour adsorbed **Th-SINAP-n**.

Table S1. Synthetic details to obtain the large single crystals of **Th-SINAP-n** (n=9-15).

| Product            | Metal                                       | Ligand                     | Solvent     | Modulator                                          |                              |                                |                       |
|--------------------|---------------------------------------------|----------------------------|-------------|----------------------------------------------------|------------------------------|--------------------------------|-----------------------|
| Code               | Th(NO <sub>3</sub> ) <sub>4</sub><br>(mmol) | H <sub>2</sub> L<br>(mmol) | DMF<br>(mL) | HCOOH<br>(mL)                                      | CF <sub>3</sub> COOH<br>(mL) | conc. HNO <sub>3</sub><br>(mL) | conc. HCl<br>(mL)     |
| <b>Th-SINAP-9</b>  | 0.008                                       | 0.004                      | 0.37        | 0.04<br>pH 2.07/5.09                               | /                            | /                              | /                     |
| <b>Th-SINAP-10</b> | 0.008                                       | 0.004                      | 0.38        | 0.045<br>pH 2.12/5.04                              | 0.03<br>pH 1.34/5.52         | 0.035<br>pH 0.63/5.09          | /                     |
| <b>Th-SINAP-11</b> | 0.008                                       | 0.004                      | 0.42        | /                                                  | 0.015<br>pH 1.74/7.16        | 0.035<br>pH 1.01/5.29          | 0.07<br>pH 0.56/4.58  |
| <b>Th-SINAP-12</b> | 0.008                                       | 0.004                      | 0.42        | 0.05 (0.03 mL<br>H <sub>2</sub> O)<br>pH 2.10/5.68 | /                            | /                              | /                     |
| <b>Th-SINAP-13</b> | 0.008                                       | 0.004                      | 0.38        | 0.015<br>pH 2.50/6.07                              | 0.015<br>pH 1.64/7.42        | 0.03<br>pH 0.96/5.38           | 0.06<br>pH 0.52/4.60  |
| <b>Th-SINAP-14</b> | 0.008                                       | 0.004                      | 0.38        | 0.03<br>pH 2.25/5.16                               | /                            | 0.03<br>pH 0.93/5.19           | 0.045<br>pH 0.63/4.92 |
| <b>Th-SINAP-15</b> | 0.008                                       | 0.004                      | 0.42        | 0.03<br>pH 2.13/5.37                               | 0.045<br>pH 1.37/6.84        | 0.03<br>pH 0.97/5.39           | 0.06<br>pH 0.73/4.59  |

Table S2. Performance of HCOOH, CF<sub>3</sub>COOH, concentrated HNO<sub>3</sub>, and concentrated HCl as modulators for Th-MOFs synthesis.

| Ligand                 |            |             |             |             |             |             |             |
|------------------------|------------|-------------|-------------|-------------|-------------|-------------|-------------|
| Code                   | Th-SINAP-9 | Th-SINAP-10 | Th-SINAP-11 | Th-SINAP-12 | Th-SINAP-13 | Th-SINAP-14 | Th-SINAP-15 |
| HCOOH                  |            |             |             |             |             |             |             |
| CF <sub>3</sub> COOH   |            |             |             |             |             |             |             |
| Conc. HNO <sub>3</sub> |            |             |             |             |             |             |             |
| Conc. HCl              |            |             |             |             |             |             |             |

Table S3. Crystallographic Data for **Th-SINAP-n** (n=9-15).

| Code                                                                   | Th-SINAP-9                                                       | Th-SINAP-10                                                     | Th-SINAP-11                                                     | Th-SINAP-12                                                       | Th-SINAP-13                                                     | Th-SINAP-14                                                                     | Th-SINAP-15                                                         |
|------------------------------------------------------------------------|------------------------------------------------------------------|-----------------------------------------------------------------|-----------------------------------------------------------------|-------------------------------------------------------------------|-----------------------------------------------------------------|---------------------------------------------------------------------------------|---------------------------------------------------------------------|
| CCDC number                                                            | 1981554                                                          | 1981555                                                         | 1981556                                                         | 1981557                                                           | 1981558                                                         | 1981560                                                                         | 1981559                                                             |
| formula                                                                | C <sub>48</sub> H <sub>24</sub> O <sub>78</sub> Th <sub>12</sub> | C <sub>24</sub> H <sub>12</sub> O <sub>19</sub> Th <sub>3</sub> | C <sub>60</sub> H <sub>36</sub> O <sub>38</sub> Th <sub>6</sub> | C <sub>144</sub> H <sub>96</sub> O <sub>76</sub> Th <sub>12</sub> | C <sub>42</sub> H <sub>24</sub> O <sub>19</sub> Th <sub>3</sub> | C <sub>84</sub> H <sub>48</sub> N <sub>12</sub> O <sub>38</sub> Th <sub>6</sub> | C <sub>400</sub> H <sub>250</sub> O <sub>156</sub> Th <sub>24</sub> |
| formula weight                                                         | 4633.15                                                          | 1300.46                                                         | 2757.13                                                         | 5826.68                                                           | 1528.73                                                         | 3225.58                                                                         | 13110.29                                                            |
| habit                                                                  | octahedral                                                       | octahedral                                                      | octahedral                                                      | octahedral                                                        | octahedral                                                      | octahedral                                                                      | octahedral                                                          |
| space Group                                                            | <i>Fm-3m</i>                                                     | <i>Fm-3m</i>                                                    | <i>Fm-3m</i>                                                    | <i>Fm-3m</i>                                                      | <i>Fm-3m</i>                                                    | <i>Fm-3m</i>                                                                    | <i>Fm-3m</i>                                                        |
| a (Å)                                                                  | 19.0604(13)                                                      | 21.9026(4)                                                      | 25.0520(7)                                                      | 28.2063(13)                                                       | 27.9387(4)                                                      | 30.4822(15)                                                                     | 30.976(4)                                                           |
| V (Å <sup>3</sup> )                                                    | 6924.6(8)                                                        | 10507.2(6)                                                      | 15722.7(13)                                                     | 22440.8(18)                                                       | 21808.1(9)                                                      | 28323(4)                                                                        | 29722(10)                                                           |
| Z                                                                      | 2                                                                | 8                                                               | 4                                                               | 2                                                                 | 8                                                               | 4                                                                               | 1                                                                   |
| T (K)                                                                  | 120                                                              | 120                                                             | 120                                                             | 120                                                               | 120                                                             | 120                                                                             | 120                                                                 |
| λ (Å)                                                                  | 0.71073                                                          | 0.71073                                                         | 0.71073                                                         | 0.71073                                                           | 0.71073                                                         | 0.71073                                                                         | 0.71073                                                             |
| Max. 2θ (°)                                                            | 54.934                                                           | 59.066                                                          | 54.898                                                          | 41.534                                                            | 68.622                                                          | 54.890                                                                          | 50.996                                                              |
| ρ <sub>calcd</sub> (g cm <sup>-3</sup> )                               | 2.222                                                            | 1.644                                                           | 1.165                                                           | 0.862                                                             | 0.931                                                           | 0.756                                                                           | 0.732                                                               |
| μ (mm <sup>-1</sup> )                                                  | 12.913                                                           | 8.520                                                           | 5.697                                                           | 3.994                                                             | 4.113                                                           | 3.170                                                                           | 3.021                                                               |
| GoF on F <sup>2</sup>                                                  | 1.097                                                            | 1.066                                                           | 1.051                                                           | 1.140                                                             | 1.057                                                           | 1.109                                                                           | 1.234                                                               |
| $wR_2 [I > 2\sigma(I)]$                                                | $\frac{R_I}{0.0840},$<br>0.2042                                  | $\frac{R_I}{0.0234},$<br>0.0482                                 | $\frac{R_I}{0.0651},$<br>0.1827                                 | $\frac{R_I}{0.0765},$<br>0.2128                                   | $\frac{R_I}{0.0274},$<br>0.0600                                 | $\frac{R_I}{0.0855},$<br>0.2293                                                 | $\frac{R_I}{0.0573},$<br>0.1568                                     |
| $wR_2$ (all data)                                                      | $\frac{R_I}{0.1043},$<br>0.2303                                  | $\frac{R_I}{0.0338},$<br>0.0514                                 | $\frac{R_I}{0.0812},$<br>0.2054                                 | $\frac{R_I}{0.0826},$<br>0.2203                                   | $\frac{R_I}{0.0419},$<br>0.0661                                 | $\frac{R_I}{0.1527},$<br>0.3077                                                 | $\frac{R_I}{0.0864},$<br>0.2038                                     |
| $\frac{(\Delta\rho)_{\max}}{(\Delta\rho)_{\min}}/e$ (Å <sup>-3</sup> ) | 6.84/<br>-4.17                                                   | 1.02/<br>-1.10                                                  | 2.22/<br>2.10                                                   | 3.73/<br>-2.02                                                    | 1.41/<br>-1.41                                                  | 1.87/<br>-2.30                                                                  | 2.02/<br>-1.06                                                      |

Table S4. Iodine adsorption capacities of selected MOFs.

| Materials                                                           | Iodine uptake<br>(wt%) | Iodine uptake<br>(I <sub>2</sub> per metal atom) | Ref. |
|---------------------------------------------------------------------|------------------------|--------------------------------------------------|------|
| Zr <sub>6</sub> O <sub>4</sub> (OH) <sub>4</sub> (sdc) <sub>6</sub> | 279 <sup>a</sup>       | <b>1.98</b>                                      | 15   |
| Th-TTHA                                                             | 53 <sup>b</sup>        | <b>0.96</b>                                      | 16   |
| ZIF-8                                                               | 125 <sup>c</sup>       | <b>1.75</b>                                      | 17   |
| HKUST-1                                                             | 175 <sup>c</sup>       | <b>1.08</b>                                      | 18   |
| Th-SINAP-8                                                          | 47 <sup>c</sup>        | <b>1.22</b>                                      | 19   |
| MOF-808                                                             | 218 <sup>c</sup>       | <b>1.94</b>                                      | 20   |
| NU-1000                                                             | 145 <sup>c</sup>       | <b>2.40</b>                                      | 20   |

Test conditions: <sup>a</sup> Iodine vapor adsorption, room temperature. <sup>b</sup> Iodine adsorption from cyclohexane solution, room temperature. <sup>c</sup> Iodine vapor adsorption, 75–80 °C.



Table S5. Kinetic parameters of the pseudo-second-order model for iodine adsorption toward **Th-SINAP-10** and **Th-SINAP-12**.

|                    | $c_0$                  | M/V                   | $q_0$                 | Removal | Second-order kinetic model |                                        |                                        |       |
|--------------------|------------------------|-----------------------|-----------------------|---------|----------------------------|----------------------------------------|----------------------------------------|-------|
|                    | (mg·kg <sup>-1</sup> ) | (mg·g <sup>-1</sup> ) | (mg·g <sup>-1</sup> ) | (%)     | $q_e$                      | $h$                                    | $k$                                    | $R^2$ |
|                    |                        |                       |                       |         | (mg·g <sup>-1</sup> )      | (mg·g <sup>-1</sup> ·h <sup>-1</sup> ) | (g·mg <sup>-1</sup> ·h <sup>-1</sup> ) |       |
| <b>Th-SINAP-10</b> | 200                    | 2.5                   | 80                    | 99.83   | 76.3                       | 228.79                                 | 0.0393                                 | 0.970 |
| <b>Th-SINAP-12</b> | 200                    | 2.5                   | 80                    | 97.32   | 82.93                      | 47.45                                  | 0.0069                                 | 0.997 |

Table S6. Fitting results of the sorption isotherms according to the Langmuir and Freundlich equations

| Sample             | Langmuir |         |         | Freundlich                             |         |         |
|--------------------|----------|---------|---------|----------------------------------------|---------|---------|
|                    | $Q_m$    | $K_L$   | $R^2$   | $k_F$                                  | $n$     | $R^2$   |
|                    | (mg/g)   | (L/mg)  |         | (L <sup>n</sup> /mol <sup>n-1</sup> g) |         |         |
| <b>Th-SINAP-10</b> | 292.4    | 0.04288 | 0.99438 | 76.18694                               | 5.05076 | 0.96204 |
| <b>Th-SINAP-12</b> | 298.5    | 0.01391 | 0.99273 | 16.80422                               | 2.32035 | 0.96185 |

### S3. REFERENCES

1. G. M. Sheldrick, 1996.
2. G. M. Sheldrick, *Acta Crystallogr. Sect. A: Found. Adv.*, 2015, **71**, 3.
3. G. M. Sheldrick, *Acta Crystallogr. Sect. C: Struct. Chem.*, 2015, **71**, 3.
4. O. V. Dolomanov, L. J. Bourhis, R. J. Gildea, J. A. K. Howard and H. Puschmann, *J. Appl. Cryst.*, 2009, **42**, 339.
5. A. L. Spek, *Acta Crystallogr. Sect. C: Struct. Chem.*, 2015, **71**, 9.
6. J. Ma, A. P. Kalenak, A. G. Wong-Foy and A. J. Matzger, *Angew. Chem. Int. Ed.*, 2017, **56**, 14618.
7. Y. Li, Z. Yang, Y. Wang, Z. Bai, T. Zheng, X. Dai, S. Liu, D. Gui, W. Liu, M. Chen, L. Chen, J. Diwu, L. Zhu, R. Zhou, Z. Chai, T. E. Albrecht-Schmitt and S. Wang, *Nat. Commun.*, 2017, **8**, 1354.
8. Y. Wang, W. Liu, Z. Bai, T. Zheng, M. A. Silver, Y. Li, Y. Wang, X. Wang, J. Diwu, Z. Chai and S. Wang, *Angew. Chem. Int. Ed.*, 2018, **57**, 5783.
9. E. A. Dolgoplova, O. A. Ejegbavwo, C. R. Martin, M. D. Smith, W. Setyawan, S. G. Karakalos, C. H. Henager, H.-C. zur Loye and N. B. Shustova, *J. Am. Chem. Soc.*, 2017, **139**, 16852.
10. P. Li, X. Wang, K.-i. Otake, J. Lyu, S. L. Hanna, T. Islamoglu and O. K. Farha, *ACS Appl. Nano Mater.*, 2019, **2**, 2260.
11. P. Li, S. Goswami, K.-i. Otake, X. Wang, Z. Chen, S. L. Hanna and O. K. Farha, *Inorg. Chem.*, 2019, **58**, 3586.
12. C. Falaise, J.-S. Charles, C. Volkringer and T. Loiseau, *Inorg. Chem.*, 2015, **54**, 2235.
13. Y. Li, Z. Weng, Y. Wang, L. Chen, D. Sheng, Y. Liu, J. Diwu, Z. Chai, T. E. Albrecht-Schmitt and S. Wang, *Dalton Trans.*, 2015, **44**, 20867.
14. P. Li, N. A. Vermeulen, C. D. Malliakas, D. A. Gómez-Gualdrón, A. J. Howarth, B. L. Mehdi, A. Dohnalkova, N. D. Browning, M. O’Keeffe and O. K. Farha, *Science*, 2017, **356**, 624.
15. R. J. Marshall, S. L. Griffin, C. Wilson and R. S. Forgan, *Chem. Eur. J.*, 2016, **22**, 4870.
16. N. Zhang, L.-X. Sun, F.-Y. Bai and Y.-H. Xing, *Inorg. Chem.*, 2020, **59**, 3964.
17. D. F. Sava, M. A. Rodriguez, K. W. Chapman, P. J. Chupas, J. A. Greathouse, P. S. Crozier and T. M. Nenoff, *J. Am. Chem. Soc.*, 2011, **133**, 12398.
18. D. F. Sava, K. W. Chapman, M. A. Rodriguez, J. A. Greathouse, P. S. Crozier, H. Zhao, P. J. Chupas and T. M. Nenoff, *Chem. Mater.*, 2013, **25**, 2591.
19. Z.-J. Li, Z. Yue, Y. Ju, X. Wu, Y. Ren, S. Wang, Y. Li, Z.-H. Zhang, X. Guo, J. Lin and J.-Q. Wang, *Inorg. Chem.*, 2020, **59**, 4435.
20. P. Chen, X. He, M. Pang, X. Dong, S. Zhao and W. Zhang, *ACS Appl. Mater. Interfaces*, 2020, **12**, 20429.
